# Supplementary material for: Comparison of Different Thoracic Regional Anesthesia Techniques on the Analgesic Effect in Cardiac Surgery: A Randomized Controlled Trial
Source: Research Square preprint supplement (doi:10.21203/rs.3.rs-6703309/v1), 2025-07-14
Supplement: Supplementary file 1 [file 13f2ccbfd0c141cf489a4ce9.xlsx]

## Sheet: Sheet1
Supplementary Table 1 Concentration of Ropivacaine in PVB, ESPB and TTMPB
Sex	Age	Concentration of Ropivacaine
Male	≥70	0.0035
	65-70	0.004
	55-65	0.0045
	＜55	0.005
Female	≥70	0.0035
	55-70	0.004
	＜55	0.0045
Total volume		40ml
